# Supplementary material for: Structure and photophysics of near-infrared emissive ytterbium(iii) monoporphyrinate acetate complexes having neutral bidentate ligands
Source: Royal Society of Chemistry journal article supplement (doi:10.1039/b909243a), 2009-01-01
Supplement: b909243a.pdf [file b909243a.pdf]

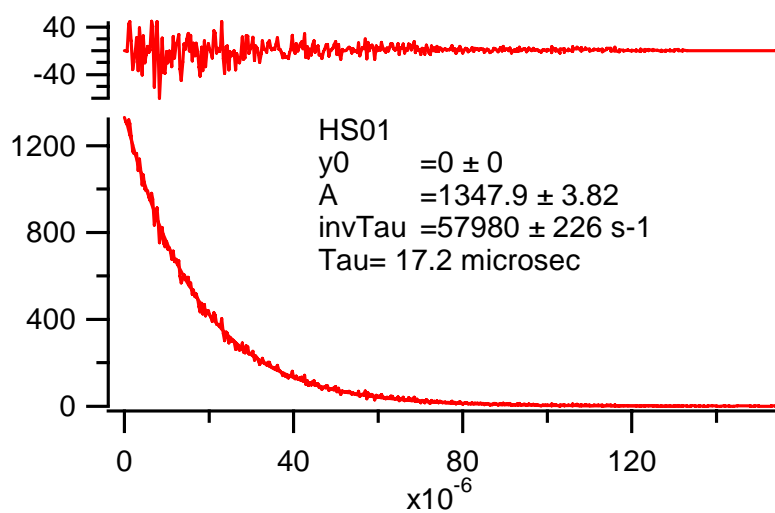

(a)

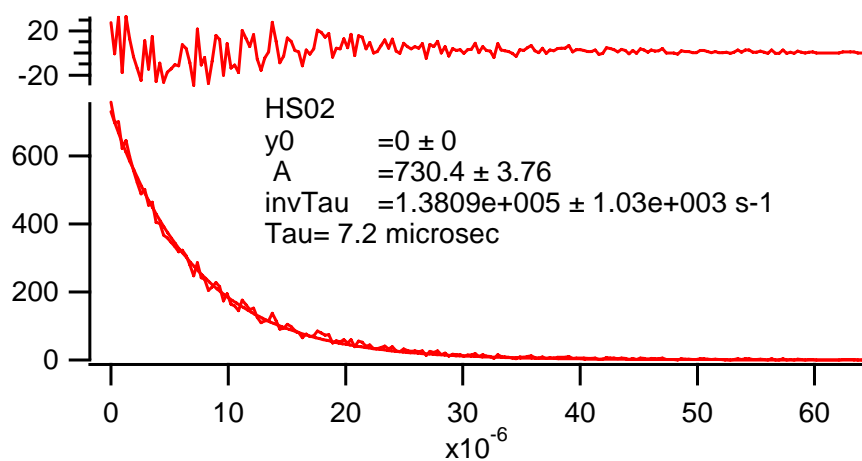

(b)

**Fig. 1S** The decay curves of complex **4** in CD<sub>3</sub>OD (top, labeled as HS01) and CH<sub>3</sub>OH (bottom, labeled as HS02). The excitation wavelength was 510 nm and decay was monitored at 978 nm.
